# Supplementary material for: The Molecular Mechanism of Ethylene-Mediated Root Hair Development Induced by Phosphate Starvation
Source: PLoS Genet. 2016 Jul 18;12(7):e1006194. doi: 10.1371/journal.pgen.1006194 (PMC4948871; doi:10.1371/journal.pgen.1006194)
Supplement: S5 Table — (XLSX) [file pgen.1006194.s023.xlsx]

## Sheet: 工作表1
Table S5. The sequences of the primers used for genotyping of the T-DNA lines.
Gene name	Primer name	Primer sequence
RHS15 (AT4G25220)	SALK_015573-LP	AAGTGACCTGCCACAAACATC
	SALK_015573-RP	TCACGAGTTGTTGTCACATCC
	SALK_015669-LP	AAGTGACCTGCCACAAACATC
	SALK_015669-RP	TCACGAGTTGTTGTCACATCC
	SALK_117952-LP	AAGGAGAGTCTTCCTGAACGC
	SALK_117952-RP	GTGAGCTTTGATCTCCAGTCG
RHS19 (AT5G67400)	SALK_020724-LP	TTACCCAAGAGGACATGATCG
	SALK_020724-RP	TGCTAACTCGTTAAACGCAGG
	SALK_010873-LP	AGGCGTTGATTGAATCATGAC
	SALK_010873-RP	TAAGGGAATCGATCGCCTATC
	SALK_093852-LP	TTGCCATCTCTATGTTCCCTG
	SALK_093852-RP	TGTTTAGAGTTGGGTCAACGG
	LBb1.3 (T-DNA right border)	ATTTTGCCGATTTCGGAAC
