# Supplementary material for: The Molecular Mechanism of Ethylene-Mediated Root Hair Development Induced by Phosphate Starvation
Source: PLoS Genet. 2016 Jul 18;12(7):e1006194. doi: 10.1371/journal.pgen.1006194 (PMC4948871; doi:10.1371/journal.pgen.1006194)
Supplement: S7 Table — (XLSX) [file pgen.1006194.s025.xlsx]

## Sheet: 工作表1
Table S7. The sequences of the primers used for qPCR analyses.
Primer name	Primer sequence
At3g12500-CHIB-realtime-F	GCCAGACTTCCCATGAAACT
At3g12500-CHIB-realtime-R	CAGGGTTGTTGAGTAAGTCA
At2g40940-ERS1-realtime-F	CTGATTCTGTCTGCAGA
At2g40940-ERS1-realtime-R	TGTGTGAATTCCACACCCTGTG
At3g23240-ERF1-realtime-F	GAGGATGGTTGTTCTCCGGTG
At3g23240-ERF1-realtime-R	ACGGAGCGGTGATCAAAGTCA
At5g25350-EBF2-realtime-F	CTTTGGTTTAGGTTCGTGATAGTGC
At5g25350-EBF2-realtime-R	CGAAGAGTTGTAATGGCGGATTAAG
At3g20770-EIN3-realtime-F	GCATGTCCACATCGAGACAGTCG
At3g20770-EIN3-realtime-R	GAGTTCACTGGCCTTGGCTGAG
At5g06630-EXT13-realtime-F	TAATGAATTGCATGGTTTATGTTGTG
At5g06630-EXT13-realtime-R	ATGAGGAGATGAGTAAGGGTATGATGT
At3g60280-UCC3-realtime-F	CGGTTTGGCTCACTGGAAAG
At3g60280-UCC3-realtime-R	CACGGACACCGAGTGTGAAA
At1g06160-ORA59-realtime-F	CCGCGGATGTCGTTGAAG
At1g06160-ORA59-rrealtime-R	CAAGGCTATCACCGGAGACTCT
At5g06640-EXT14-realtime-F	TCCTTACTCATCCCCTCAAACC
At5g06640-EXT14-rrealtime-R	TTGGATGTGGCGCGTACTTA
At1g54970-PRP1-realtime-F	CTCCATTTGCACCAAAACCA
At1g54970-PRP1-realtime-R	GATGCCTCCAACGGCTTTAA
At1g27740-RSL4-realtime-F	GTGCCAAACGGGACAAAAGT
At1g27740-RSL4-realtime-R	TTGTGATGGAACCCCATGTC
At4g25220-RHS15-realtime-F	TGTCAAGGGAACACTTTCTGCAT
At4g25220-RHS15-realtime-R	CAAGCAAGGCTGTTCCATCA
At3g60330-AHA7-realtime-F	TTGCAGAACGTGGCCTAAGA
At3g60330-AHA7-realtime-R	TGGACCACCTTCACCTTTAACA
At5g35190-EXT15-realtime-F	CGAGTGCATTGCATGGTTTATG
At5g35190-EXT15-realtime-R	GTTTGATGGGATGAGTAAGGGTATG
At1g34510-PER13a-realtime-F	TGCAGCATTGCTTCGTATGC
At1g34510-PER13a-realtime-R	CGGTTGTTGGGTCGATCAAG
At2g24980-EXT7-realtime-F	TATTGCGGCTACGGTGACATC
At2g24980-EXT7-realtime-R	CTTTGTGTTCATAGCTGGGAGAATT
At3g54590-EXT2-realtime-F	GTTATCATCATGGCAACAATGGTT
At3g54590-EXT2-realtime-R	TCAGGAAGCGGTGAAGAATACA
At2g37870-realtime-F	GGCTAGCCTAAGCCCGTGTT
At2g37870-realtime-R	CACCAACTTTGGCACAGCAA
At4g11280-ACS6-realtime-F	GATGGCTGCAACAACTATGATG
At4g11280-ACS6-realtime-R	CCTGAGGTTACTCTGCCAACA
At4g19680-IRT2 realtime-F	CGGTCATGGTGTAGTGCTAGCA
At4g19680-IRT2 realtime-R	CAACCTCCAATACCATGGCAAT
At5g67400-RHS19-realtime-F	CTTCGTCACCATCCCAGCTACT
At5g67400-RHS19-realtime-R	GAATCATGACCGACGCATCA
At3g18780-Actin2-realtime-F	GACCTTGCTGGACGTGACCTTAC
At3g18780-Actin2-realtime-R	GTAGTCAACAGCAACAAAGGAGAGC
At5g03545-At4-realtime-F	TGGCCCCAAACACAAGAG
At5g03545-At4-realtime-R	CGAACATTCACAATCATAATCTCC
At3g09922-IPS1-realtime-F	AGACTGCAGAAGGCTGATTCAGA
At3g09922-IPS1-realtime-R	TTGCCCAATTTCTAGAGGGAGA
At5g43350-AtPT1-realtime-F	TGATGATCTTGTGCTCTGTCG
At5g43350-AtPT1-realtime-R	ATGACACCCTTGGCTTCGT		`
At2g38940-AtPT2-realtime-F	CGAAGCTCCTCGGTCGTAT
At2g38940-AtPT2-realtime-R	GGAGAGTCCCAGGCTTTTGT
At2g02990-RNS1-realtime-F	TTGTTATCCAAATTCAGGCAAA
At2g02990-RNS1-realtime-R	AGTTAGGCCAAAGACCATGAAT
At2g34202-miR399D-realtime-F	AATACTCCTATGGCAGATCGCATTGG
At2g34202-miR399D-realtime-R	TCCTTTGGCAGAGAAGCATTTTACTTG`
At3g17790-ACP5-realtime-F	CTTAAGTCCTATTGCAGGCTAGGT
At3g17790-ACP5-realtime-R	TTGCTAAAAATGATAGGGATGCT
At2g16430-PAP10-realtime-F	ATCCTGTTGATGATTCTCCTTCTTG
At2g16430-PAP10-realtime-R	ATTCATTTATTTGGACGTGACCTTAC
