# Supplementary material for: The Molecular Mechanism of Ethylene-Mediated Root Hair Development Induced by Phosphate Starvation
Source: PLoS Genet. 2016 Jul 18;12(7):e1006194. doi: 10.1371/journal.pgen.1006194 (PMC4948871; doi:10.1371/journal.pgen.1006194)
Supplement: S9 Table — (XLSX) [file pgen.1006194.s027.xlsx]

## Sheet: 工作表1
Table S9. The sequences of the primers used for ChIP-qPCR analyses.
Primer name	Primer sequence
At3g60330-AHA7-realtime-F-1	ATTTCGTAATGACCAAGTTCGTTT
At3g60330-AHA7-realtime-R-1	TCAGCAAAAATCATTTGAAGATGT
At3g60330-AHA7-realtime-F-2	AGATGCTGAGAGGGGCTACAAT
At3g60330-AHA7-realtime-R-2	ATTGTCACTATTGTTACCGCAAAAT
At1g06160-ORA59-realtime-F-1	GTCTTCCTCCGCCTTAGTTTCT
At1g06160-ORA59-realtime-R-1	AAATAGGTCAAACATGCGGCT
At1g06160-ORA59-realtime-F-2	AAGATACAATGTAGCAGCGGTTTA
At1g06160-ORA59-realtime-R-2	TAGTGATCAATTGCACATTTATGAA
At1g06160-ORA59-realtime-F-3	TTCACCCACTTCTGTGTATCTCA
At1g06160-ORA59-realtime-R-3	CATAAAAACGGAAAATGGGGC
At5g24140-SQP2-realtime-F-1	CCTTAGCAAATTTAACAAACAAAC
At5g24140-SQP2-realtime-R-1	ATTCTGAGTTGTGTTGGATTAGTAG
At5g24140-SQP2-realtime-F-2	AATCCAAACTATGATCTTTTGCG
At5g24140-SQP2-realtime-R-2	TCAGCTACATGTTGAAATCGGC
At5g24140-SQP2-realtime-F-3	ATGAGGCATCTCTTGTAGTCTTGTT
At5g24140-SQP2-realtime-R-3	ACGTGTTAATTTGCTCAGCATAGT
At2g24980-EXT7-realtime-F-1	AGGTAACTTTCAAACTTATGACGAAA
At2g24980-EXT7-realtime-R-1	GCCTAAAATGACTTAGTCAACAAAAC
At2g24980-EXT7-realtime-F-2	CGTTTGGTTTAGAACAATCCCTT
At2g24980-EXT7-realtime-R-2	GAAACAAGCACAACATAGAGTTACAG
At2g24980-EXT7-realtime-F-3	CCATTTATTTTGTTCCGTCTAATG
At2g24980-EXT7-realtime-R-3	CATTAGAGTTGCTTATGCTGTTTCT
At2g24980-EXT7-realtime-F-4	GAAACAGCATAAGCAACTCTAATGTA
At2g24980-EXT7-realtime-R-4	GCAACATTTGATTCACGACCAT
At2g24980-EXT7-realtime-F-5	ATGGTCGTGAATCAAATGTTGC
At2g24980-EXT7-realtime-R-5	AAGGATTATAAGTTGAAGAATTGTATG
At2g24980-EXT7-realtime-F-6	CAAACATACAACTTAGCACGTTCTC
At2g24980-EXT7-realtime-R-6	ACTTGAACATGAACACCCTTTA
At1g34510-PER13a-realtime-F-1	AACCATTCAAAGCCTCAATCTT
At1g34510-PER13a-realtime-R-1	ATGGTATAACACTGGCAAGCG
At1g34510-PER13a-realtime-F-2	CGCTTGCCAGTGTTATACCAT
At1g34510-PER13a-realtime-R-2	CGAAGACGTGCAGAGAATAAAG
At1g34510-PER13a-realtime-F-3	TGCCAATGTCTTGTCCCCA
At1g34510-PER13a-realtime-R-3	CTAAGTTTTCTCTCGTATGTGAAAGC
At3g60280-UCC3-realtime-F-1	TCTGGTAGGTTTTAGTTTCACACG
At3g60280-UCC3-realtime-R-1	CAATGACAGAACAAGAATCCCATA
At3g60280-UCC3-realtime-F-2	CATCTTCTAATTTTGTTACGTGTGC
At3g60280-UCC3-realtime-R-2	TTCATCAATTCCGTCGTATATTTG
At5g06630-EXT13-realtime-F-1	GCAAGATTGACGATAGATTCTGTTAG
At5g06630-EXT13-realtime-R-1	ATCAACTGATCATTAATTATCGCACA
At5g06630-EXT13-realtime-F-2	GTAAGAAACAGCATAAGCAACTCTAATG
At5g06630-EXT13-realtime-R-2	CAACATTTCCTCATGGGCG
At5g06630-EXT13-realtime-F-3	ATCCTTAAAAATTGAGGGTTGCTC
At5g06630-EXT13-realtime-R-3	TAGTCTTACTTTGTGTTCTCAACTTGC
At1g54970-PRP1-realtime-F-1	CTTCTCAGTGTCTCCAAAATCTATTCT
At1g54970-PRP1-realtime-R-1	CCCTATGCGAAGCACTTTGAG
At1g54970-PRP1-realtime-F-2	GTTGGTGGGTTATTCATTTTTGC
At1g54970-PRP1-realtime-R-2	GGTGATGAATCTCCGTTTTCGT
At1g54970-PRP1-realtime-F-3	GGGAAATGGTGATTTGAGTGG
At1g54970-PRP1-realtime-R-3	GTGCATTCAATTGGATTTGTAGG
At1g54970-PRP1-realtime-F-4	GAAAAACAACAAAATCGGGTAACA
At1g54970-PRP1-realtime-R-4	AAGGATCGTAGAACTGTGGTTGG
At5g06640-EXT14-realtime-F-1	TCTACCCGTCGAACTACCATCA
At5g06640-EXT14-realtime-R-1	TCACTATTAAACATAGAAACAGGAACCT
At5g06640-EXT14-realtime-F-2	TGAGTAGGTAATACTAACCACAAGACCA
At5g06640-EXT14-realtime-R-2	GGATCCACCTGAAAACTTGTACTATAT
At5g06640-EXT14-realtime-F-3	TTGAGTTGACAAAGTTCAAACAAAAG
At5g06640-EXT14-realtime-R-3	GGAGAATATGAAATTTTATTAGATCCTC
At4g19680-IRT2-realtime-F-1	GCAGTGTTTGTGGCATCTGAAG
At4g19680-IRT2-realtime-R-1	CTGTGTTTGCTCCATTTATTTGG
At4g19680-IRT2-realtime-F-2	ACCAATTTAGCAATACATTTTGACAGT
At4g19680-IRT2-realtime-R-2	TGGAAGGTGTGGATCATGCC
At4g19680-IRT2-realtime-F-3	TCCAGGCTTCTCTTCGATTAAAC
At4g19680-IRT2-realtime-R-3	CGGAATCCTGATTTTATTGATTGT
